# Supplementary material for: TRPV6 Regulation by Cis-22a and Cholesterol
Source: MDPI journal article supplement (doi:10.3390/biom12060804), 2022-06-08
Supplement: s1 [file s1]

**Figure S1**

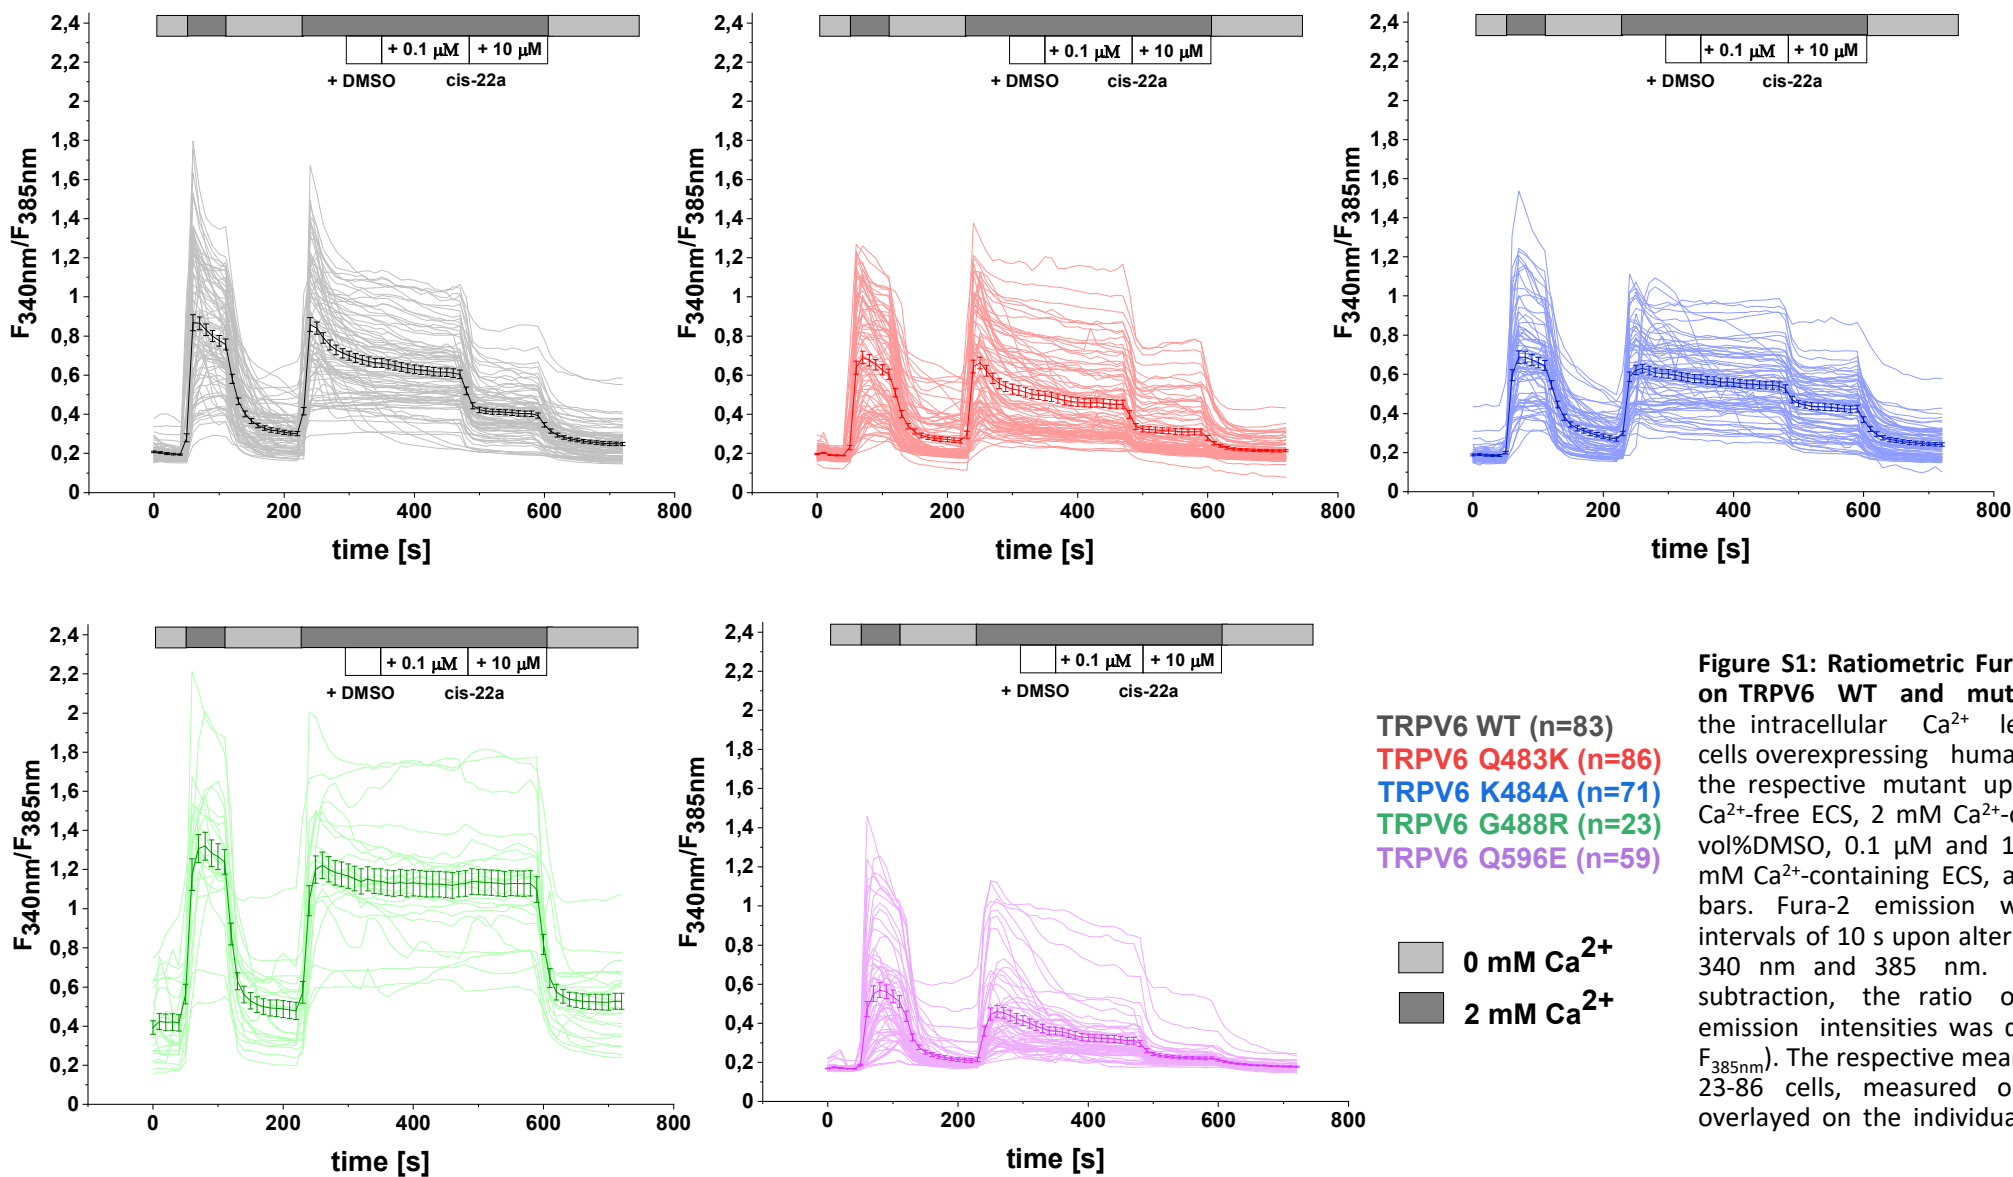

**Figure S1: Ratiometric Fura-2 measurements on TRPV6 WT and mutants.** Changes in the intracellular  $Ca^{2+}$  level of HEK293 cells overexpressing human TRPV6 WT or the respective mutant upon perfusion with  $Ca^{2+}$ -free ECS, 2 mM  $Ca^{2+}$ -containing ECS, 0.1 vol%DMSO, 0.1  $\mu$ M and 10  $\mu$ M cis-22a in 2 mM  $Ca^{2+}$ -containing ECS, as indicated by the bars. Fura-2 emission was monitored in intervals of 10 s upon alternating excitation at 340 nm and 385 nm. After background subtraction, the ratio of the respective emission intensities was determined ( $F_{340nm}/F_{385nm}$ ). The respective mean values ( $\pm$  SEM) of 23-86 cells, measured on 2-4 days, are overlayed on the individual traces.

**Figure S2**

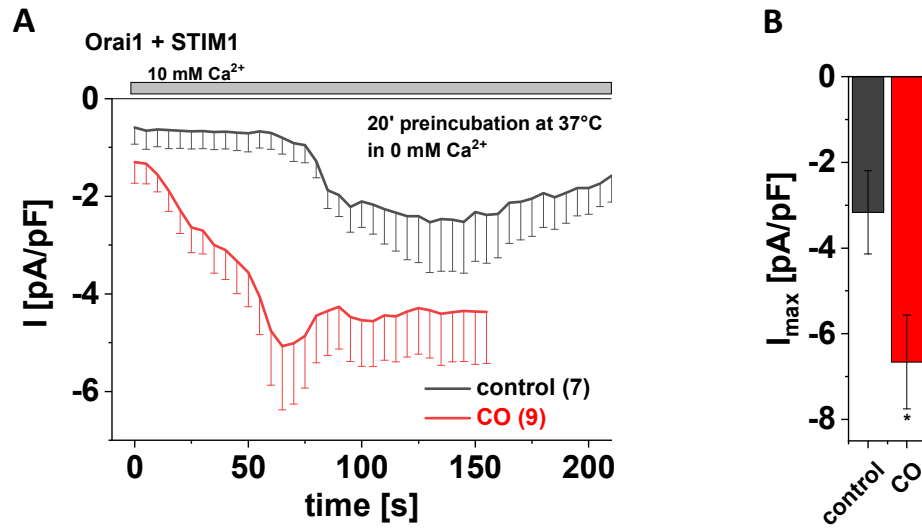

**Figure S2: Preincubation with cholesterol oxidase significantly increases maximum CRAC currents.** **(A)** Averaged time course of whole-cell currents (mean  $\pm$  SEM) recorded from HEK 293 cells coexpressing Orai1 and STIM1. Cells were preincubated in 0 mM  $\text{Ca}_{2+}$  extracellular solution with (red) and without (control, black) 2 U/ml CO at 37 °C for 20 minutes. Measurements were carried out in 10 mM  $\text{Ca}_{2+}$  extracellular solution. **(B)** Block diagram of maximum currents according to measurements in (A). The asterisk (\*) highlights the statistical significance ( $p < 0.05$ ) in comparison to control experiments.
